# Supplementary material for: Hydrous pyrolysis of glucose using a rapid pulsed reaction technique
Source: Royal Society of Chemistry journal article supplement (doi:10.1039/d3re00268c), 2023-01-01
Supplement: d3re00268c1.pdf [file d3re00268c1.pdf]

## Electronic Supplementary Information

### Hydrous pyrolysis of glucose using a rapid pulsed reaction technique

Hamed Baniamerian,<sup>a</sup> Martin Høj,<sup>a</sup> Matthias Josef Beier,<sup>b</sup> Anker Degn Jensen,<sup>\*a</sup>

<sup>a</sup> Department of Chemical and Biochemical Engineering, Technical University of Denmark, Kgs. Lyngby, 2800, Denmark

<sup>b</sup> Topsoe A/S, Kgs. Lyngby, 2800, Denmark

\*Corresponding author:

Anker Degn Jensen

*Department of Chemical and Biochemical Engineering, Technical University of Denmark  
Building 229, 2800 Kgs. Lyngby, Denmark*

*E-mail address: aj@kt.dtu.dk; Tel: 22171723*

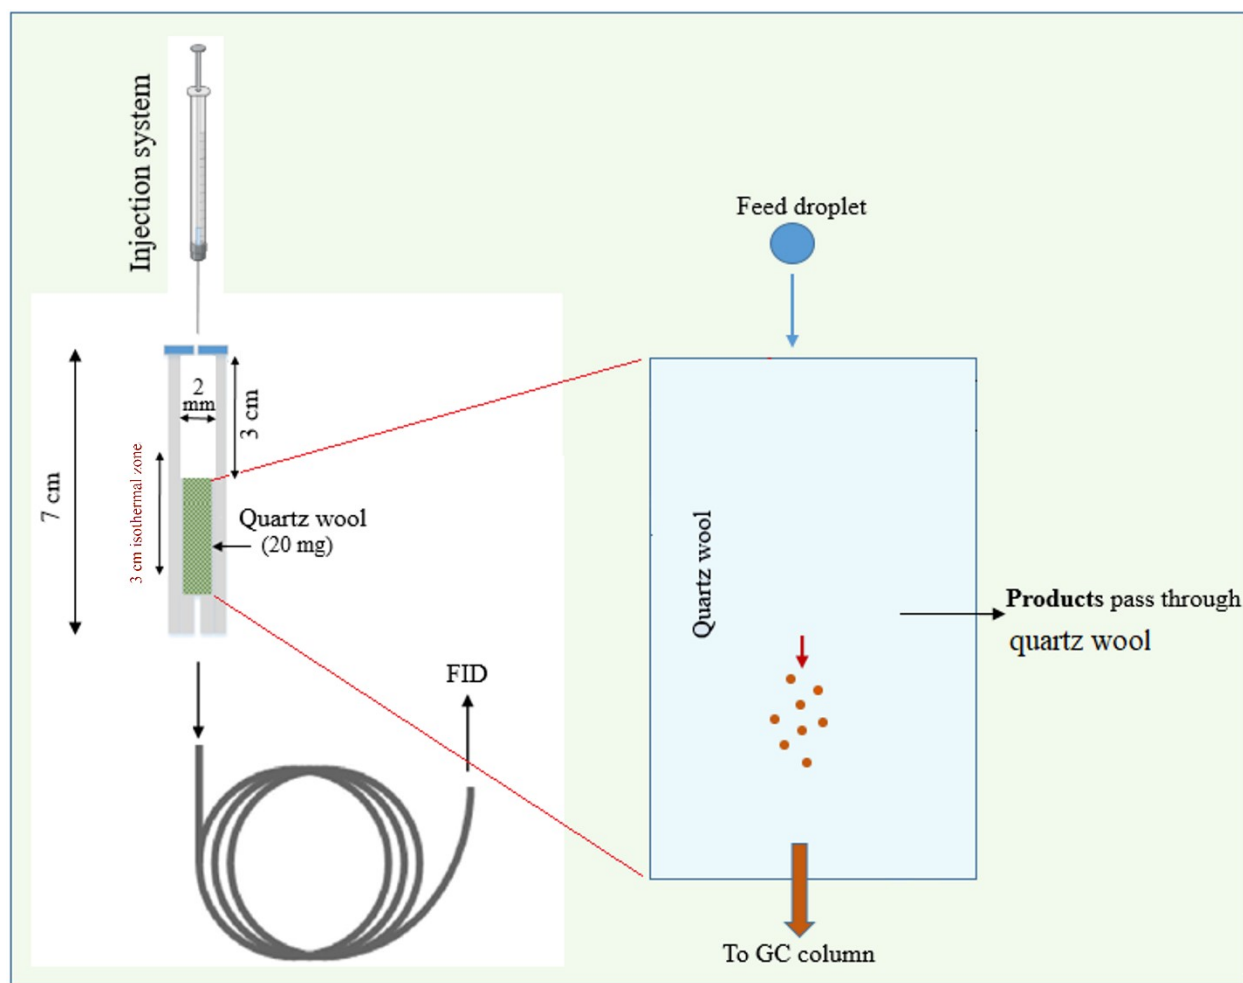

Figure S1: Schematic of the GC inlet liner used as reactor and experimental set-up.

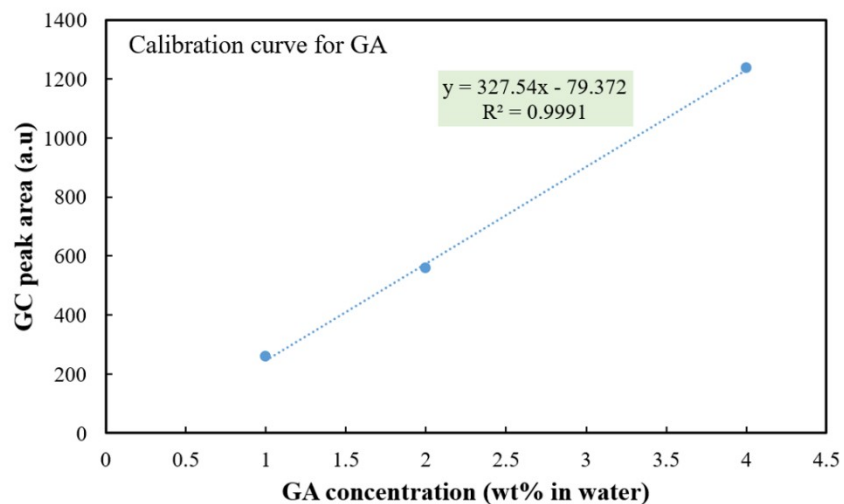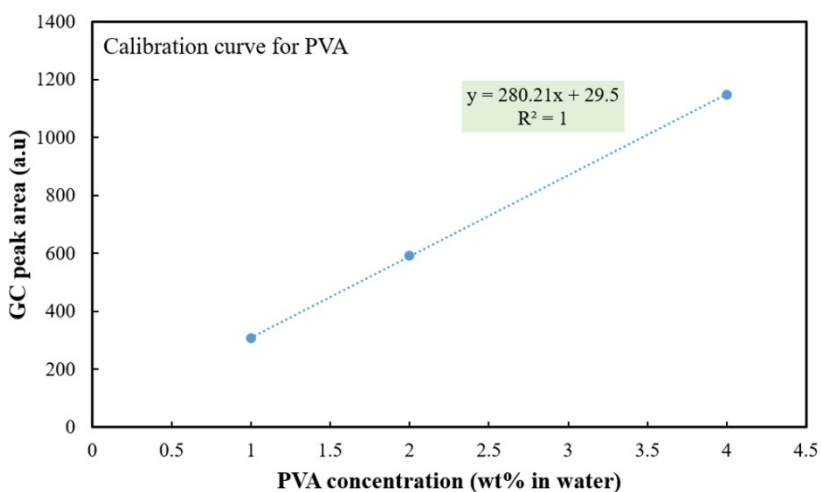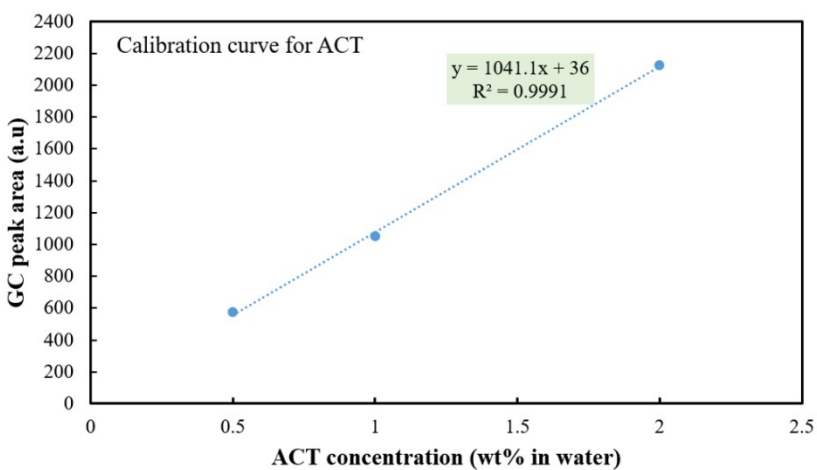

Figure S2: GC-FID calibration curve for glycolaldehyde (GA), pyruvaldehyde (PVA), and acetol (ACT) at liner temperature of 180 °C.

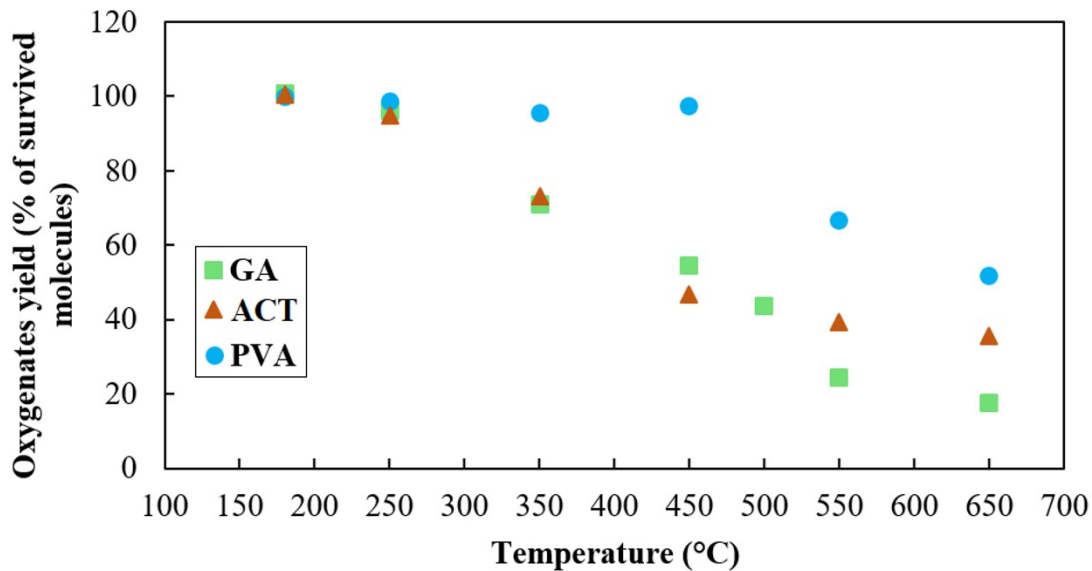

Figure S3: Oxygenates yields for experiments injecting 4% GA, 4% PVA, and 2% ACT at different temperatures (decomposition correction factor at different temperatures).

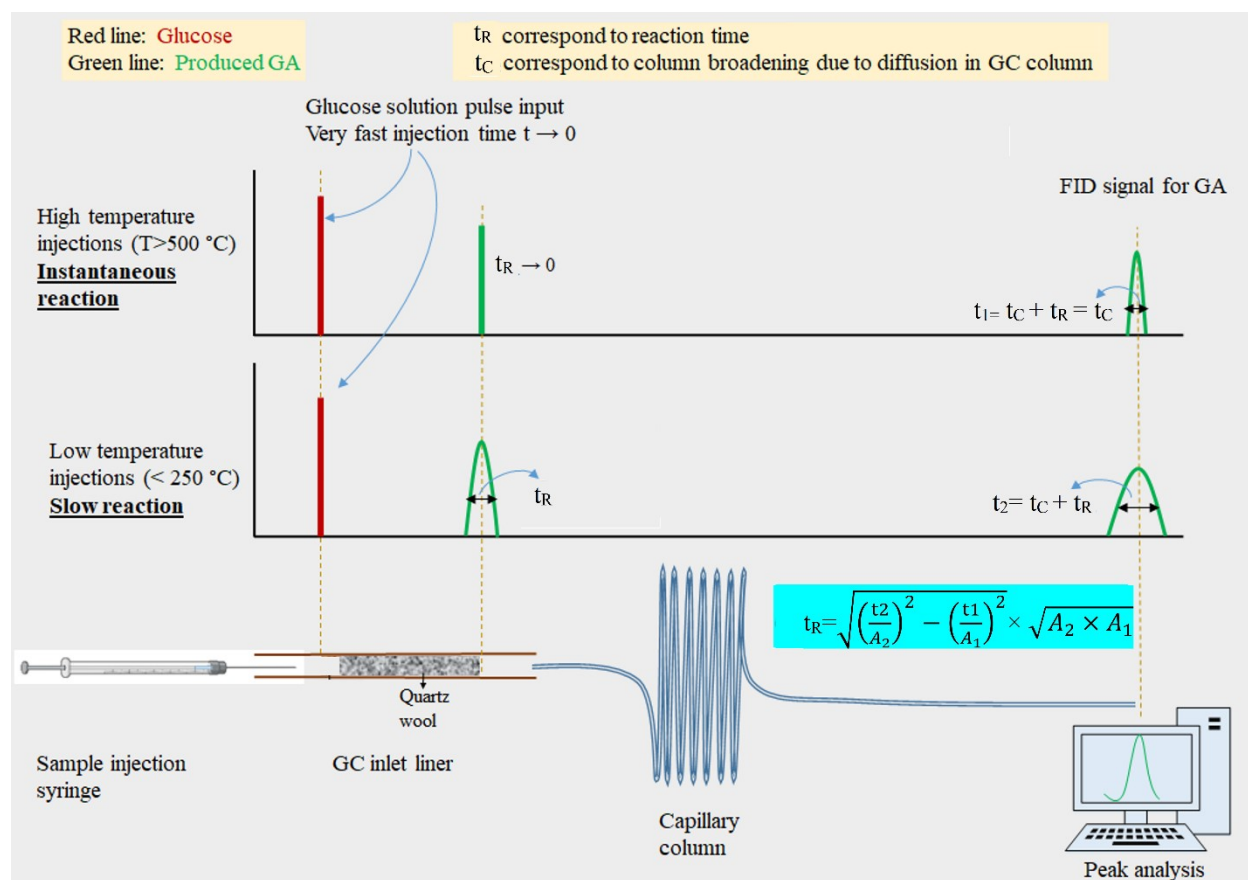

Figure S4: Analysis of GC peak width and reaction time.

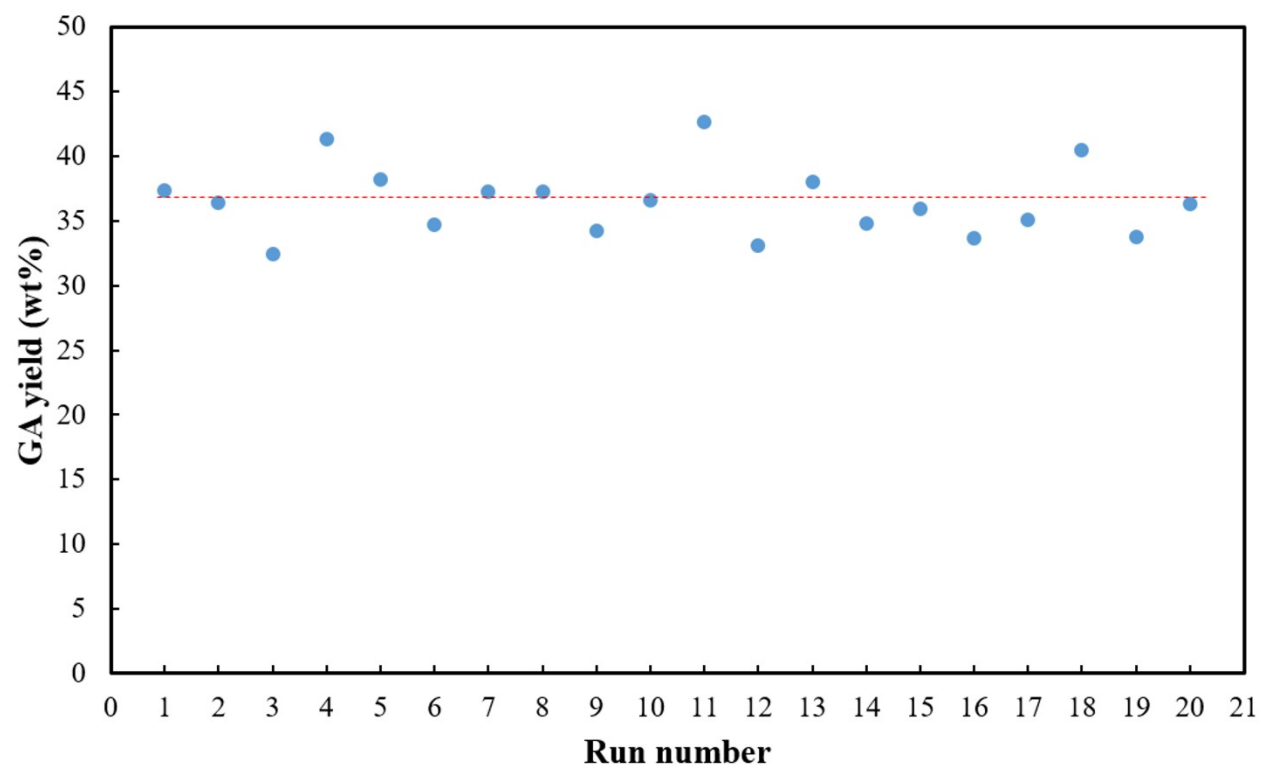

Figure S5: Corrected yield of GA from consecutive pulse pyrolysis of 20 wt.% aqueous glucose (T=350 °C, 20 mg quartz wool as bed material).

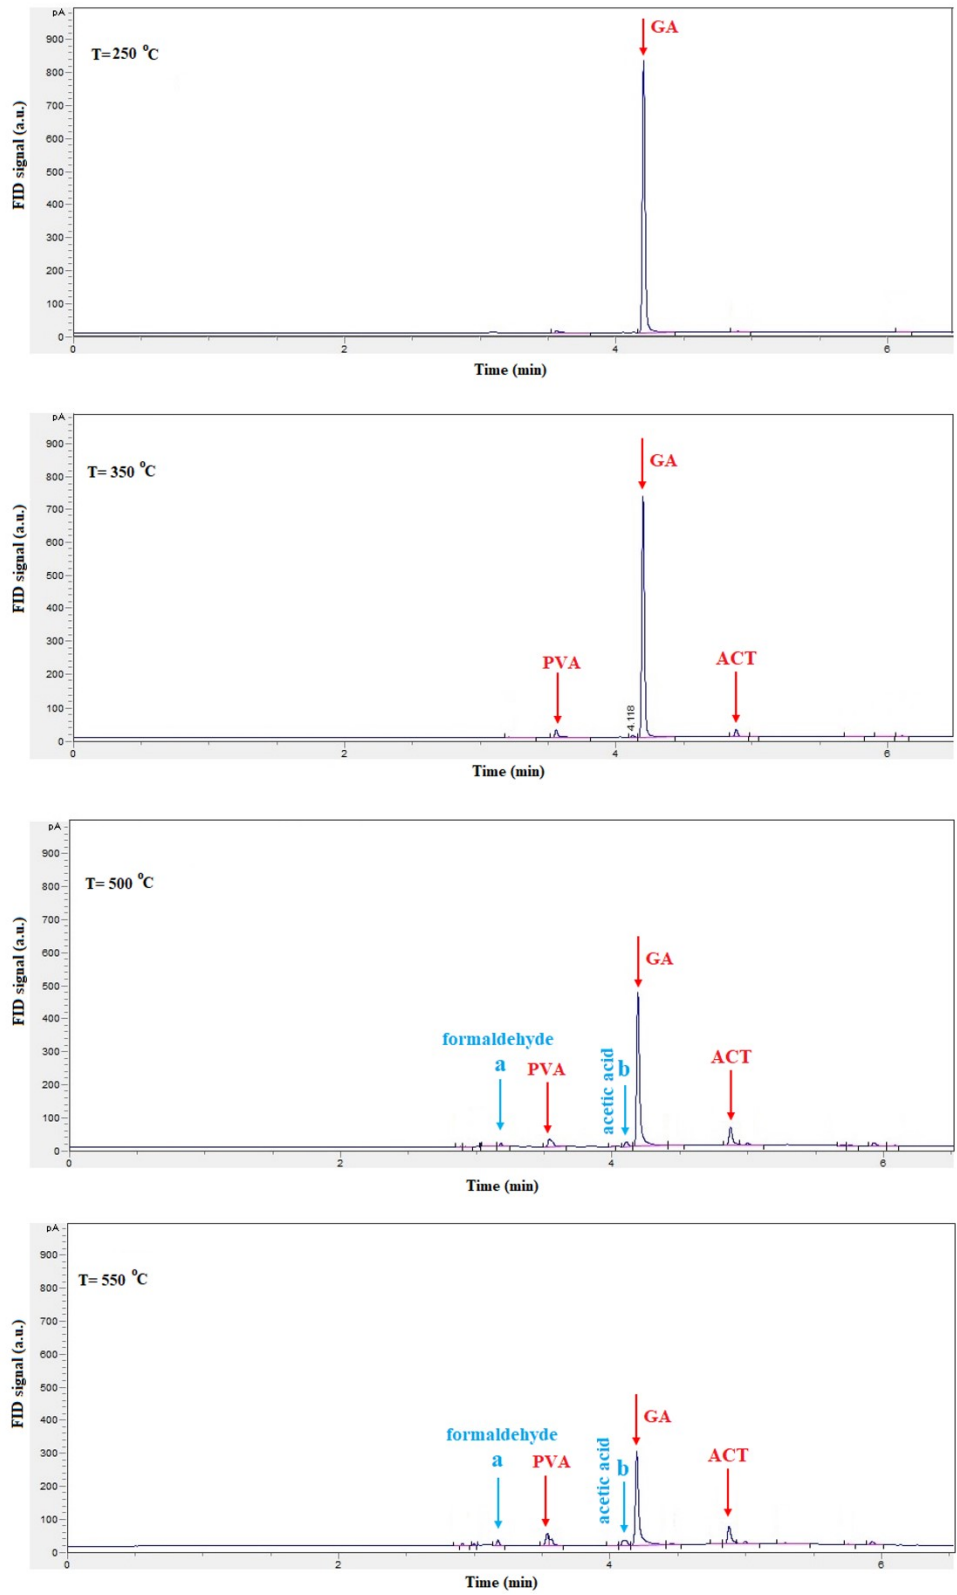

Figure S6: Detected peaks after GA injection at different liner temperatures; 20 mg quartz wool as bed material.

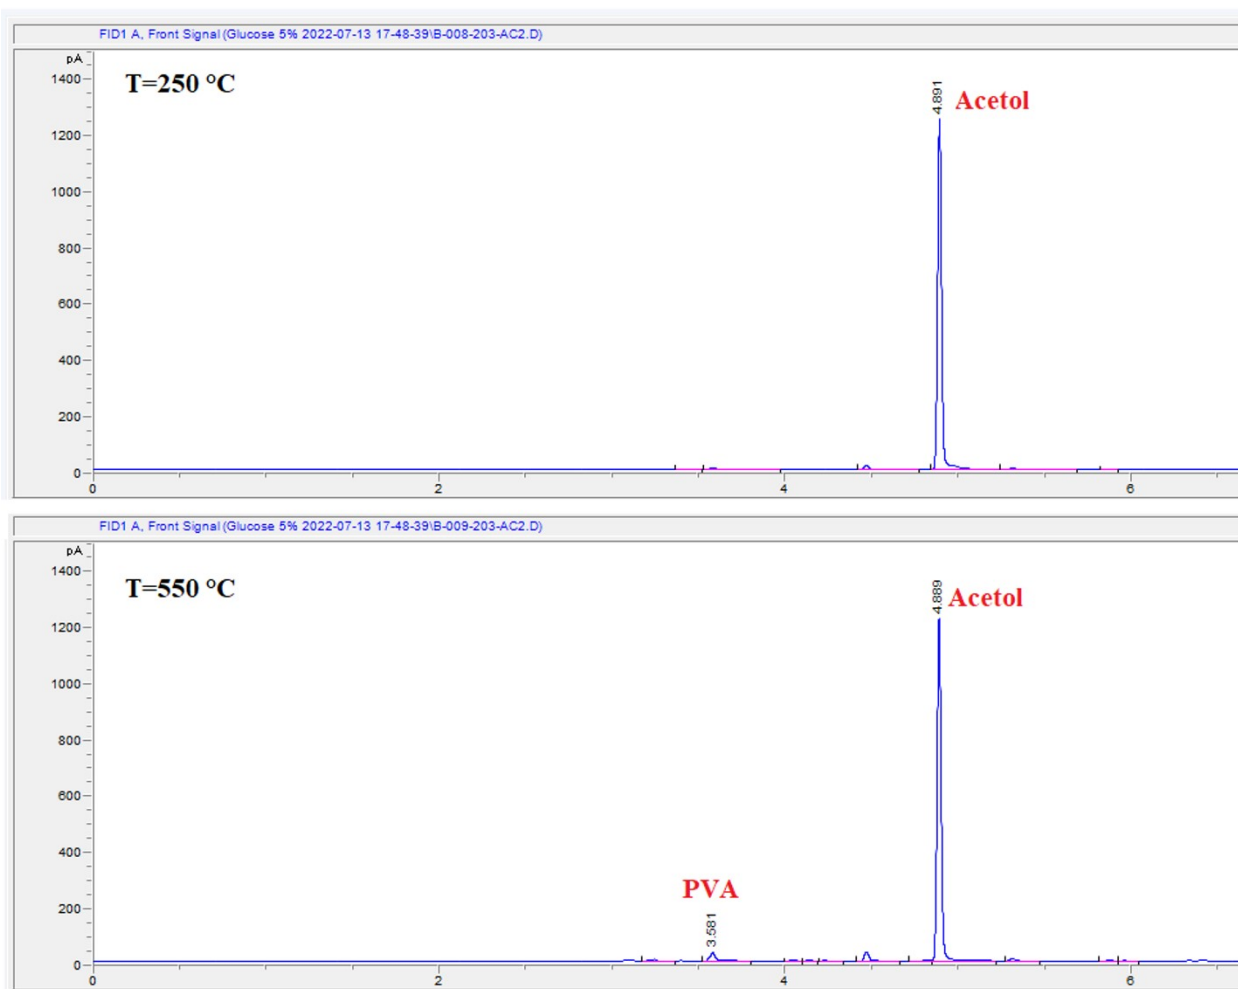

**Figure S7: Detected peaks after acetol injection at different liner temperatures; 20 mg quartz wool as bed material.**

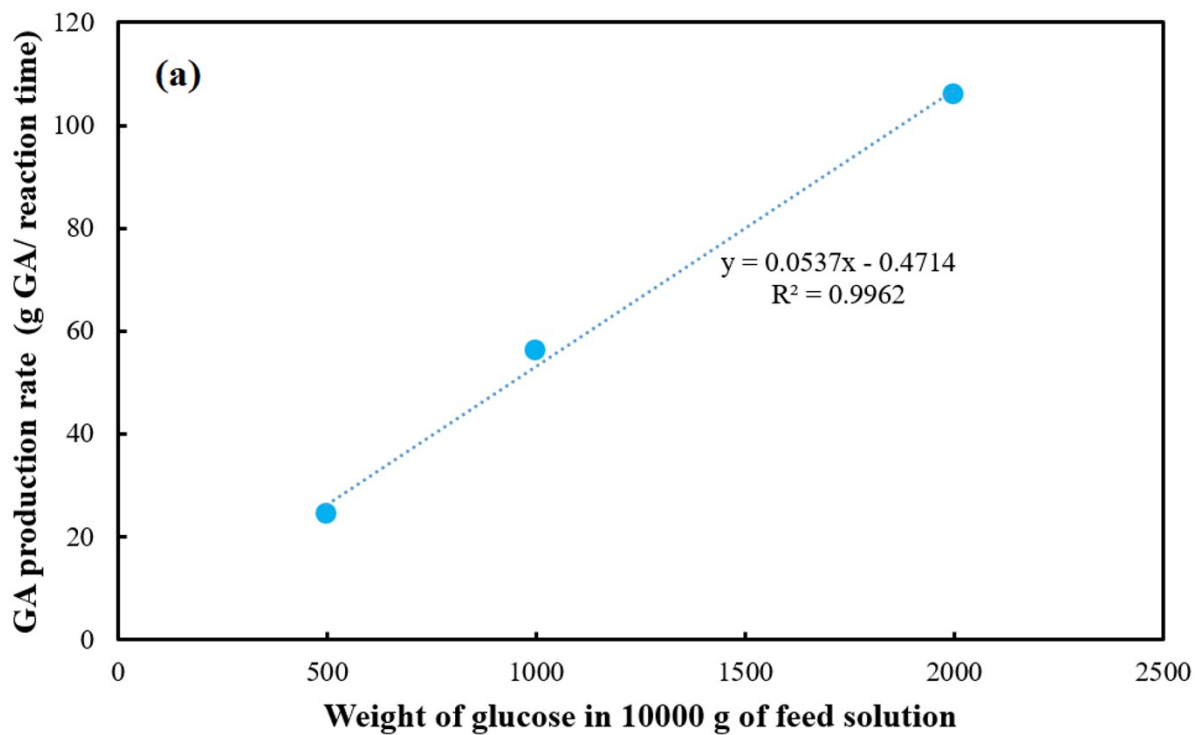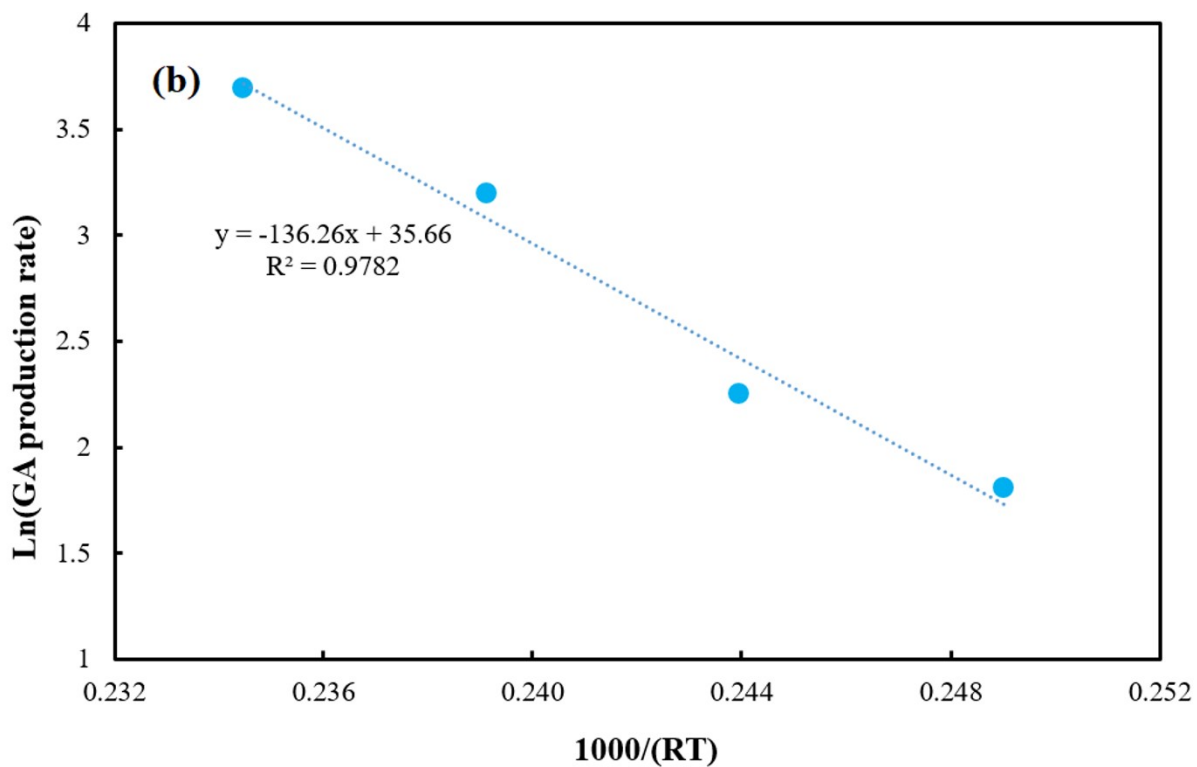

Figure S8: (a) GA production rate at 230 °C from different weights of glucose; (b) Temperature dependence of GA production rate at 210–240 °C from using 5 wt.% aqueous glucose solution.



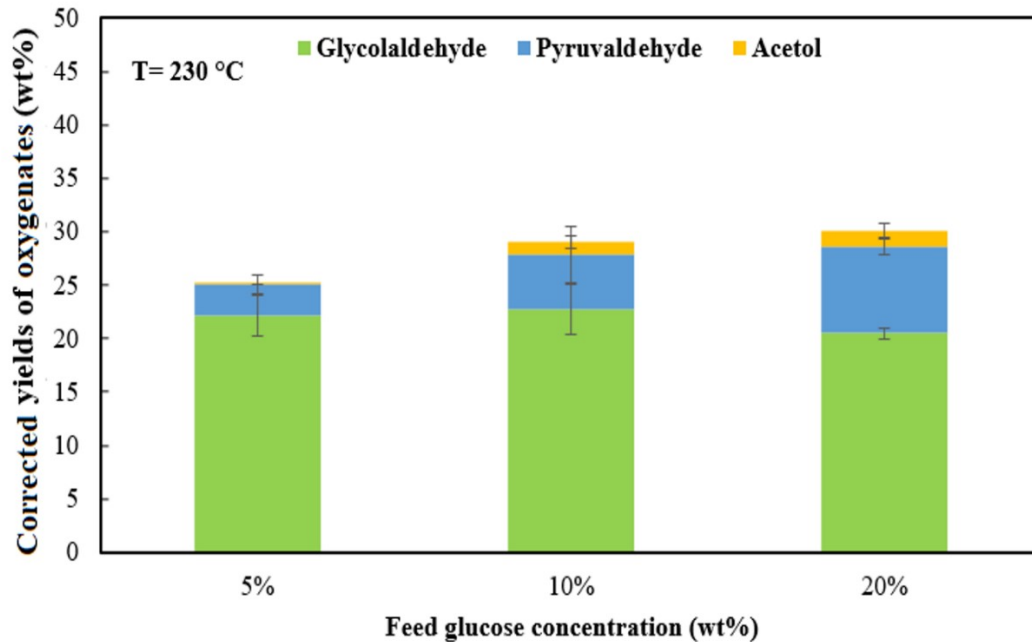

Figure S9: Corrected oxygenates yields at low temperature (230 °C) with different glucose concentration; 20 mg quartz wool as bed material.

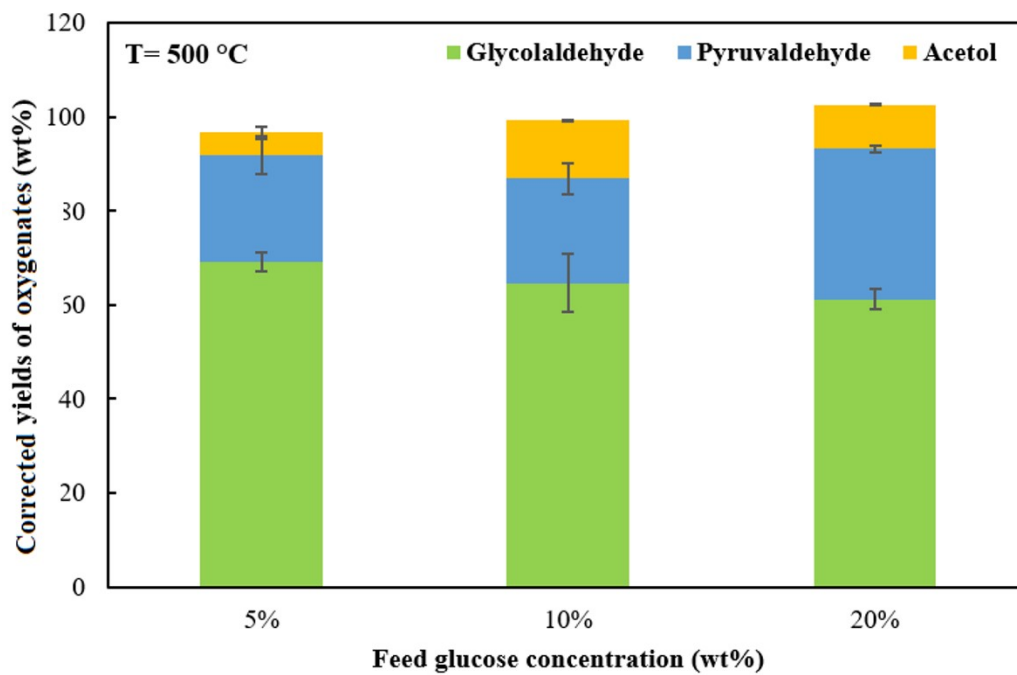

Figure S10: Corrected oxygenates yields at 500 °C with different glucose concentrations; 20 mg quartz wool as bed material.

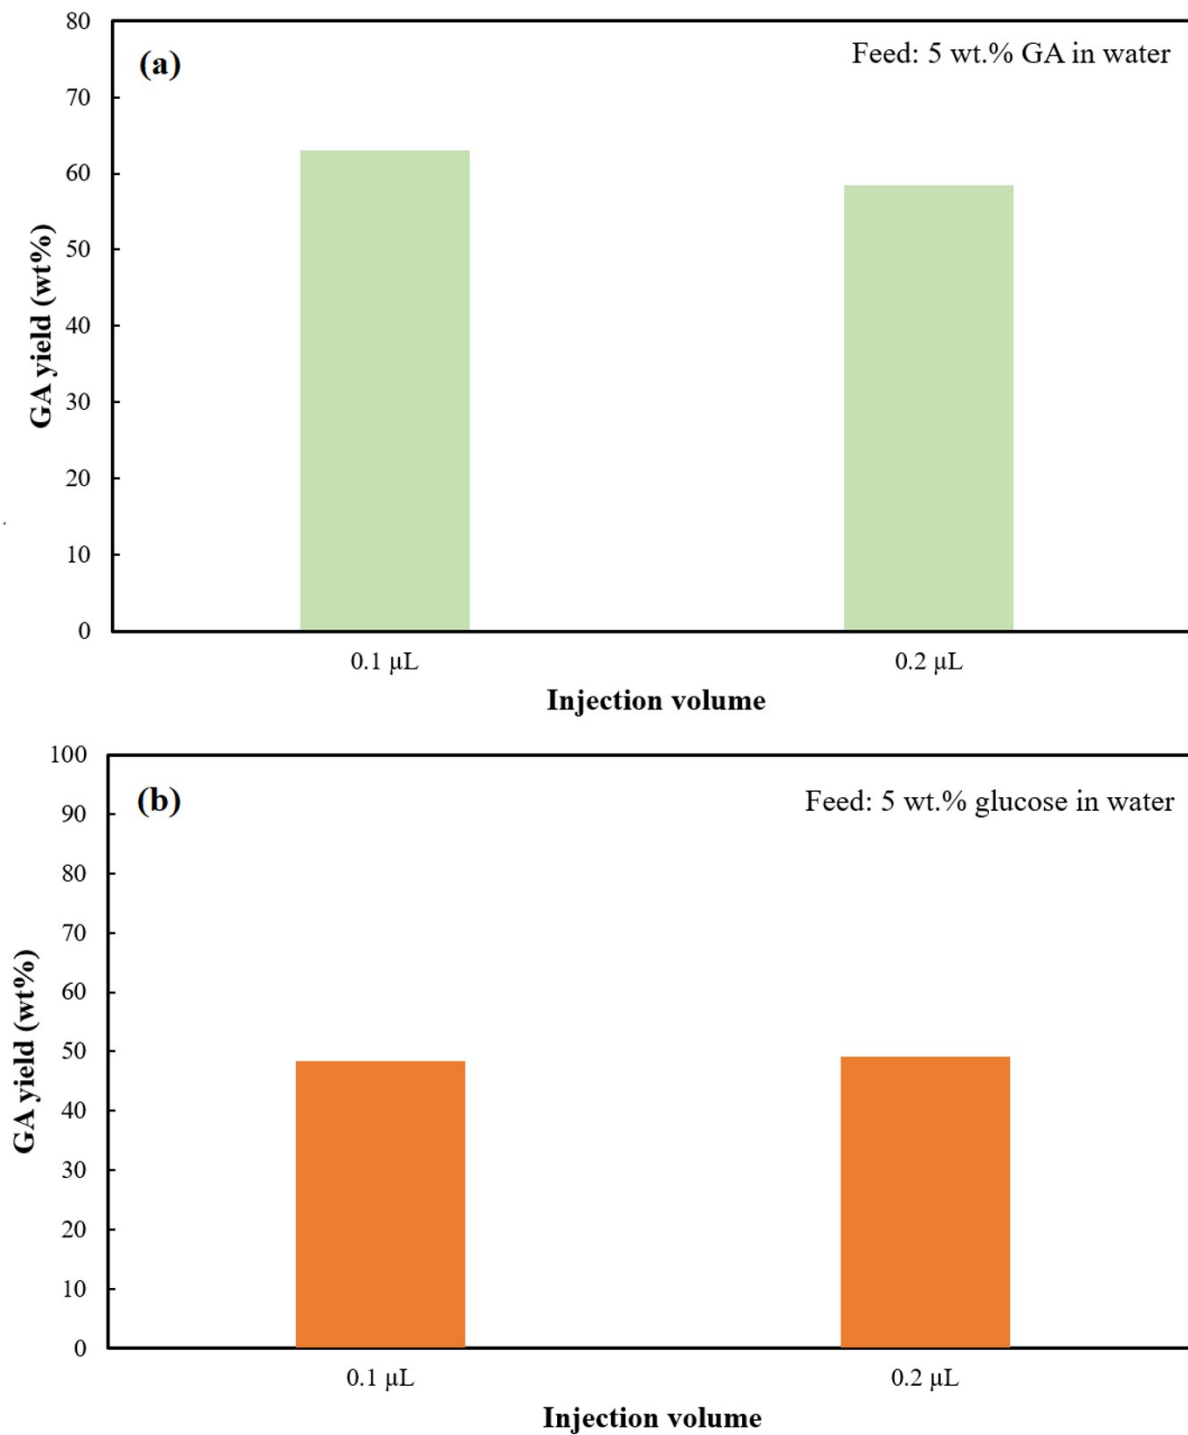

Figure S11: Yield of unconverted GA from 5 wt% GA aqueous solution (a) and corrected GA yields from 5 wt% glucose aqueous solution (b) at 400  $^{\circ}\text{C}$  and two different injection volumes.

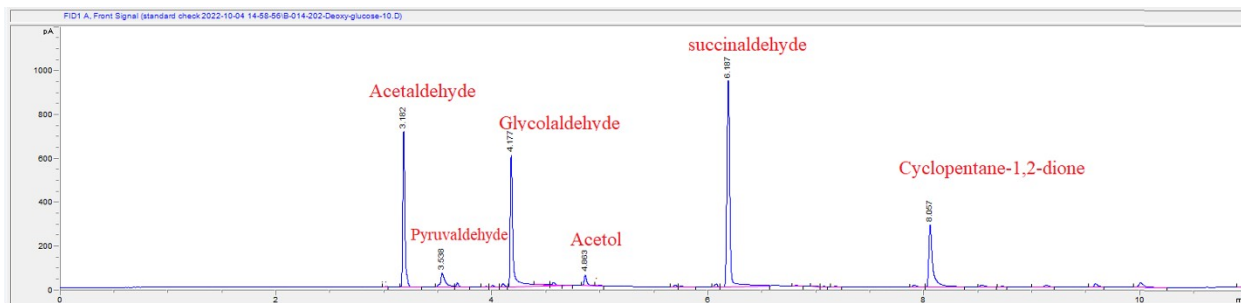

Figure S12: Detected GC-FID peaks after 2-deoxy-d-glucose injection into the inlet liner at 400 °C.

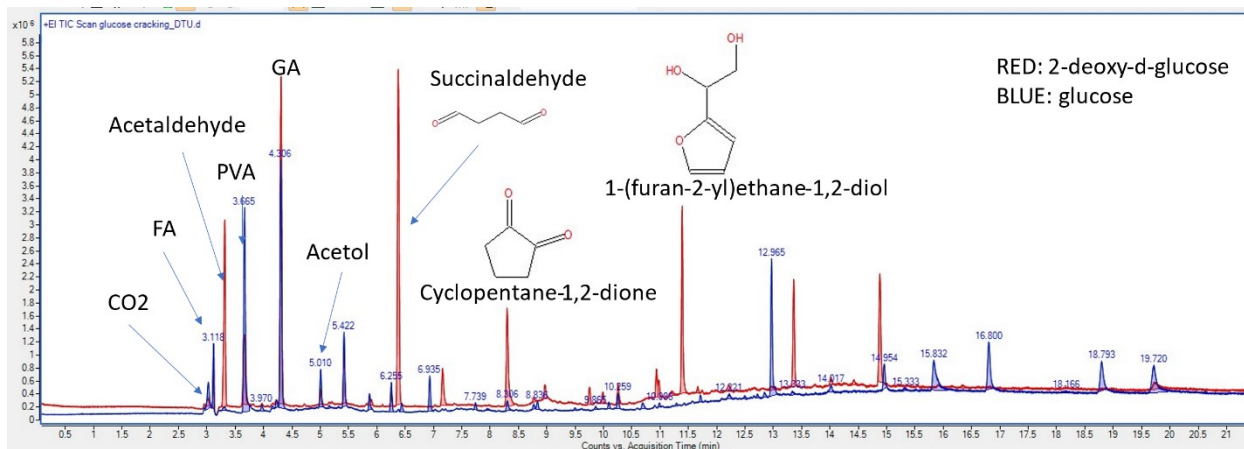

Figure S13: GC-MS spectra for glucose (blue) and 2-deoxy-d-glucose (red) hydrous cracking at 400 °C. Molecules represent hits from NIST database.

**Table S1: Corrected yields of GA, acetaldehyde, PVA, and ACT from hydrous cracking of 10 wt% of glucose and 2-deoxy-d-glucose in water at different temperatures.**

| Temperature (°C) | Oxygenates yields (wt%) from glucose |              |       |      | Oxygenates yields (wt%) from 2-deoxy-d-glucose |              |       |       |
|------------------|--------------------------------------|--------------|-------|------|------------------------------------------------|--------------|-------|-------|
|                  | GA                                   | acetaldehyde | PVA   | ACT  | GA                                             | acetaldehyde | PVA   | ACT   |
| 300              | 24.05                                | 0            | 10.43 | 0.18 | 55.28                                          | 15.72        | 5.98  | 0.068 |
| 350              | 32.62                                | 0            | 13.68 | 0.14 | 65.15                                          | 13.14        | 5.56  | 0.19  |
| 400              | 41.92                                | 0            | 15.34 | 0.42 | 62.62                                          | 13.20        | 6.36  | 0.80  |
| 450              | 41.22                                | 0            | 18.94 | 1.83 | 26.75                                          | 25.22        | 5.79  | 1.94  |
| 500              | 60.98                                | 0            | 22.27 | 2.39 | 25.50                                          | 26.05        | 6.96  | 2.40  |
| 550              | 59.47                                | 0            | 17.96 | 4.51 | 30.62                                          | 21.94        | 10.33 | 2.95  |

**A1: Estimated temperature drop at the moment of 0.2 μL (0.0002 g) water injection:**

Required energy for heating water from 25 to 500°C:

$$A: \text{From } 25 \text{ to } 100^\circ\text{C} = 0.0002 \text{ g} \cdot 4.184 \text{ J}/(\text{g}\cdot\text{K}) \cdot 75 \text{ K} = 0.06276 \text{ J}$$

$$B: \text{heat of vaporization} = 0.0002 \text{ g} \cdot 2260 \text{ J/g} = 0.452 \text{ J}$$

$$C: \text{from } 100 \text{ to } 500^\circ\text{C} = 0.0002 \text{ g} \cdot 1.9 \text{ J}/(\text{g}\cdot\text{K}) \cdot 400 \text{ K} = 0.152 \text{ J}$$

$$\text{Required energy for heating water from } 25 \text{ to } 500^\circ\text{C} = A + B + C = 0.6667 \text{ J}$$

Approximate temperature drop of quartz wool:

$$\text{Quartz wool weight} = 20 \text{ mg} = 0.002 \text{ g}$$

$$\text{Heat capacity of quartz wool} \sim 741 \text{ J}/(\text{g}\cdot\text{K})$$

$$0.002 \text{ g} \cdot 741 \text{ J}/(\text{g}\cdot\text{K}) \cdot (\Delta T) = 0.6667 \text{ J}$$

$$\Delta T = 0.45 \text{ K}$$

Therefore, the temperature drop is less than 1°C at the moment of liquid injection. In the calculation, it was assumed that all of the quartz wool contributes to the evaporation. Even if only 10% of the quartz wool are wetted, the temperature drop will still be less than 10 °C.
